# Mountain stoneflies may tolerate warming streams: evidence from organismal physiology and gene expression

Scott Hotaling<sup>1,\*</sup>, Alisha A. Shah<sup>2,\*</sup>, Kerry L. McGowan<sup>1</sup>, Lusha M. Tronstad<sup>3</sup>, J. Joseph Giersch<sup>4</sup>, Debra S. Finn<sup>5</sup>, H. Arthur Woods<sup>2</sup>, Michael E. Dillon<sup>6,a</sup>, and Joanna L. Kelley<sup>1,a</sup>

## Affiliations:

<sup>1</sup> School of Biological Sciences, Washington State University, Pullman, WA, USA

<sup>2</sup> Division of Biological Sciences, University of Montana, Missoula, MT, USA

<sup>3</sup> Wyoming Natural Diversity Database, University of Wyoming, Laramie, WY, USA

<sup>4</sup> U.S. Geological Survey, Northern Rocky Mountain Science Center, West Glacier, MT, USA

<sup>5</sup> Department of Biology, Missouri State University, Springfield, MO, USA

<sup>6</sup> Department of Zoology and Physiology, University of Wyoming, Laramie, WY, USA

\* *Contributed equally*

<sup>a</sup> *Co-supervised research*

## Correspondence:

Scott Hotaling, School of Biological Sciences, Washington State University, Pullman, WA, 99164, USA; Email: [scott.hotaling@wsu.edu](mailto:scott.hotaling@wsu.edu); Phone: (828) 507-9950; ORCID: 0000-0002-5965-0986

Alisha A. Shah, Division of Biological Sciences, University of Montana, Missoula, MT, 59812, USA, Email: [alisha.shah@mso.umt.edu](mailto:alisha.shah@mso.umt.edu); Phone: (512) 694-7532; ORCID: 0000-0002-8454-7905

**Running head:** Thermal tolerance of mountain stoneflies

**Keywords:** critical thermal maximum; RNAseq; Plecoptera; alpine streams; thermal tolerance; climate change; *Lednia tumana*; endangered species; glacier biology

## Abstract:

Rapid glacier recession is altering the physical conditions of headwater streams. Stream temperatures are predicted to rise and become increasingly, potentially putting entire meltwater-associated biological communities at risk of extinction. Thus, there is a pressing need to

understand how thermal stress affects mountain stream insects, particularly where glaciers are likely to vanish on contemporary timescales. In this study, we tested the critical thermal maximum ( $CT_{MAX}$ ) of stonefly nymphs representing multiple species and a range of thermal regimes in the high Rocky Mountains, USA. We then collected RNA-sequencing data to assess how organismal thermal stress translated to the cellular level. Our focal species included the meltwater stonefly, *Lednia tumana*, which was recently listed under the U.S. Endangered Species Act due to climate-induced habitat loss. For all study species, critical thermal maxima ( $CT_{MAX} > 20^{\circ}C$ ) far exceeded natural stream temperatures mountain stoneflies experience ( $< 10^{\circ}C$ ). Moreover, while evidence for a cellular stress response was present, we also observed constitutive expression of genes encoding proteins known to underlie thermal stress (i.e., heat shock proteins) even at low temperatures that reflected natural conditions. Our results challenge the prevailing notion that high-elevation aquatic insects are physiologically threatened by warming temperatures. Rather, we posit that other factors (e.g., competition) may better explain their extreme distributions.

## Introduction:

Predicting how species will respond to climate change is a central goal of contemporary ecology (Araújo & New, 2007, Urban *et al.*, 2016). This goal is difficult, however, because at a minimum it requires knowledge of extant distributions, physiological limits, and future conditions in relevant habitats. Mountain streams around the world are being transformed by climate change, primarily through rapid recession of glaciers and perennial snowfields (Hotelling *et al.*, 2017). Loss of permanent snow and ice are predicted to reduce total streamflows and lead to higher, more variable temperatures (Huss & Hock, 2018, Jones *et al.*, 2014). Expected ecological responses include a reduction of biodiversity in headwater streams across multiple levels of biological organization and taxonomic groups (Bálint *et al.*, 2011, Finn *et al.*, 2013, Giersch *et al.*, 2017, Hotelling *et al.*, 2019a, Jordan *et al.*, 2016). Considerable attention has been devoted to potential losses of aquatic insect diversity (e.g., Jacobsen *et al.*, 2012), as macroinvertebrates are often the largest organisms inhabiting mountain streams. However, the specific mechanisms underlying physiological limits in alpine stream insects remain unknown. This knowledge gap is particularly important in light of the widely held assumption that aquatic insects living at high-elevations are cold-adapted stenotherms that will not tolerate warming streams (Giersch *et al.*, 2015, Jacobsen *et al.*, 2012). Both physiological (e.g., Shah *et al.*, 2017b) and cellular (e.g., Ebner *et al.*, 2019) evidence contradicting this assumption have recently emerged, raising new questions about whether climate warming directly threatens

headwater biodiversity. To better understand the degree to which headwater species can tolerate warming, links between relevant traits at the organismal (thermal stress) and cellular (e.g., gene expression) level are needed.

As small ectotherms, insect body temperatures depend strongly on their external environment. Insects are therefore threatened by rising global temperatures, and recent studies have documented declines in their diversity (Lister & Garcia, 2018, Sánchez-Bayo & Wyckhuys, 2019). The effects of temperature on ectotherm performance and survival, however, are complex. Ectotherms may respond to stressful temperatures through plasticity or acclimatization (Seebacher *et al.*, 2015), the evolution of higher thermal limits (Angilletta Jr *et al.*, 2007), or behavioral thermoregulation (Kearney *et al.*, 2009). Temperature can also affect organismal distributions indirectly. For instance, changing temperatures can alter ratios of oxygen supply and demand (Portner *et al.*, 2007, Verberk *et al.*, 2016). Or, cold habitats can provide a natural buffer against invasions by competitors or predators (Isaak *et al.*, 2015). Thus, temperature likely shape both the evolution of aquatic insect physiology as well as their local network of biotic interactions. To understand the relationship between temperature and ectotherm tolerance, trait-based approaches (e.g., testing upper thermal tolerance) can be effective. However, a focus on physiological traits at the whole-organism level may overlook other key aspects of a species' potential for response, perhaps limiting predictions of whether species can evolve in response to changing thermal regimes (Chown *et al.*, 2010) or tolerate them *in situ* via plasticity. Thus, there is a need to connect traits from cellular to organismal levels and consider findings holistically.

Most aquatic insects develop as nymphs for extended periods before emerging as winged adults. Due to the high heat capacity of water, stream temperatures are less variable than air. However, a surprising amount of thermal variation still exists in streams due to many factors, including latitude, elevation, flow, and canopy cover (Shah *et al.*, 2017b). At high-elevations, an additional factor—the primary source of water input—plays an outsized role in dictating thermal variation downstream (Hotaling *et al.*, 2017). High-elevation freshwaters are fed by four major hydrological sources: glaciers, snowfields, groundwater aquifers, and subterranean ice (Hotaling *et al.*, 2019a, Tronstad *et al.*, 2019, Ward, 1994). Glaciers and subterranean ice (e.g., rock glaciers) promote near constant, extremely cold conditions (i.e., less than 3°C year-round) whereas snowmelt- and groundwater-fed streams are warmer and often more thermally variable (Hotaling *et al.*, 2019a, Tronstad *et al.*, 2019). However, these general thermal “rules” only apply in close proximity to a primary source. Patterns can change dramatically downstream as flows are altered (e.g., pooling into a high-elevation pond) and

sources mix (e.g., a warmer groundwater-fed stream flows into a glacier-fed stream). With extensive thermal variation over small geographic scales and abundant, putatively cold-adapted resident invertebrates, high-elevation waters provide an ideal, natural model for testing hypotheses of physiological limits in a framework relevant to global change predictions.

In this study, we investigated gene expression as a function of tolerance to heat stress for stonefly nymphs collected from high-elevation streams in the northern Rocky Mountains. We focused on three taxa—*Lednia tumana*, *Lednia tetonica*, and *Zapada* sp.—all of which have habitat distributions closely aligned with cold, meltwater stream conditions. *Lednia tumana* was recently listed under the U.S. Endangered Species Act due to climate-induced habitat loss (U.S. Fish & Wildlife Service, 2019). To test thermal tolerance at the organismal level, we measured the critical thermal maximum ( $CT_{MAX}$ ), a widely used metric for comparing survivable thermal limits among animals (Healy *et al.*, 2018). We specifically addressed three overarching questions: (1) Does natural thermal variation in stream temperature predict mountain stonefly  $CT_{MAX}$ ? (2) Do high-elevation stoneflies mount cellular stress responses when subjected to heat stress? And, if so, which genes are involved? (3) Is there a link between habitat conditions, organismal limits, and underlying gene expression? Following Shah *et al.* (2017b), we expected nymphs from more thermally variable streams with higher maximum temperatures to have correspondingly higher values of  $CT_{MAX}$ . We also expected to observe a signal of cellular stress with genes typical of heat stress responses [e.g., heat shock proteins (HSPs)] upregulated. Finally, we expected nymphs that experience higher temperatures in nature to exhibit a correspondingly muted cellular stress response. Collectively, our study sheds new light on thermal stress in high-elevation stream insects and contributes new perspective to a pressing challenge for the field: clarifying if species living in cold headwaters are as sensitive to warming temperatures as their extreme distributions suggest.

**Table 1.** Environmental variation, mountain range, and habitat types included in this study. GNP: Glacier National Park, Montana. GRTE: Teton Range, Wyoming.  $T_{MAX}$ : the maximum temperature observed,  $T_{RANGE}$ : the difference between the maximum and minimum temperatures observed, and  $T_{MEAN}$ : the mean temperature observed. All temperature data are in degrees Celsius. SPC: specific conductivity ( $\mu S\ cm^{-1}$ ), PI: Pfanckuch Index, a measure of stream channel stability (higher values correspond to a less stable streambed). Temperatures were measured on a representative day in late July 2019 for all sites except Lunch Creek (data from late July 2014). See Table S1 for specific dates of temperature data collection.

| Population                | Range | Taxa               | Type        | $T_{MAX}$ | $T_{RANGE}$ | $T_{MEAN}$ | SPC   | PI  |
|---------------------------|-------|--------------------|-------------|-----------|-------------|------------|-------|-----|
| Lunch Creek               | GNP   | <i>L. tumana</i>   | Snowmelt    | 9.9       | 5.7         | 6.2        | 40.7  | 25  |
| Wind Cave                 | GRTE  | <i>Zapada</i> sp.  | Icy seep    | 3.2       | 0.5         | 2.8        | 101.1 | 18  |
| Mt. St. John              | GRTE  | <i>L. tetonica</i> | Icy seep    | 4.6       | 2.2         | 3.0        | 25.0  | 34  |
| Cloudveil Dome            | GRTE  | <i>L. tetonica</i> | Glacier-fed | 2.1       | 0.3         | 2.0        | 4.1   | 32  |
| Sillet Glacier            | GRTE  | <i>L. tetonica</i> | Glacier-fed | 7.1       | 4.4         | 4.4        | 3.1   | 34  |
| Tetonia Pond <sup>a</sup> | GRTE  | <i>L. tetonica</i> | Pond        | 4.9       | 2.3         | 3.1        | 29.3  | n/a |

<sup>a</sup> Named by the authors. Does not reflect official conventions.

## Materials and Methods:

### Specimen collection

During the summer of 2018 (29 July-6 August), we collected late-instar stonefly nymphs representing at least three species (*Lednia tumana*, *Lednia tetonica*, and *Zapada* sp.; Family Nemouridae) from six streams in Glacier National Park (GNP), Montana, and Grand Teton National Park and the surrounding region (GRTE), Wyoming, USA (Figure 1; Tables 1, S1). We selected a later summer timepoint because it represents the warmest stream temperatures nymphs experience before emerging in August. Also, given the seasonality of  $CT_{MAX}$  in temperate aquatic insects (Shah *et al.*, 2017a), we sought to measure  $CT_{MAX}$  of our focal specimens at the height of summer when we expected  $CT_{MAX}$  to peak. Specimens were collected by turning over rocks and gently transferring nymphs to a small tray filled with streamwater. Nymphs were brought to the laboratory in 1 L Whirl-Pak bags (Nasco) filled with streamwater surrounded by snow or ice. Species were identified based on morphological variation following previous studies (e.g., Giersch *et al.*, 2017). Unlike *Lednia*, multiple *Zapada* species can be present in the same stream and previous genetic data has indicated the presence of cryptic diversity in the group (Hotelling *et al.*, 2019b). Therefore, we cannot exclude the possibility of more than one species of *Zapada* in the Wind Cave population and thus only identified *Zapada* to genus (Table 1).



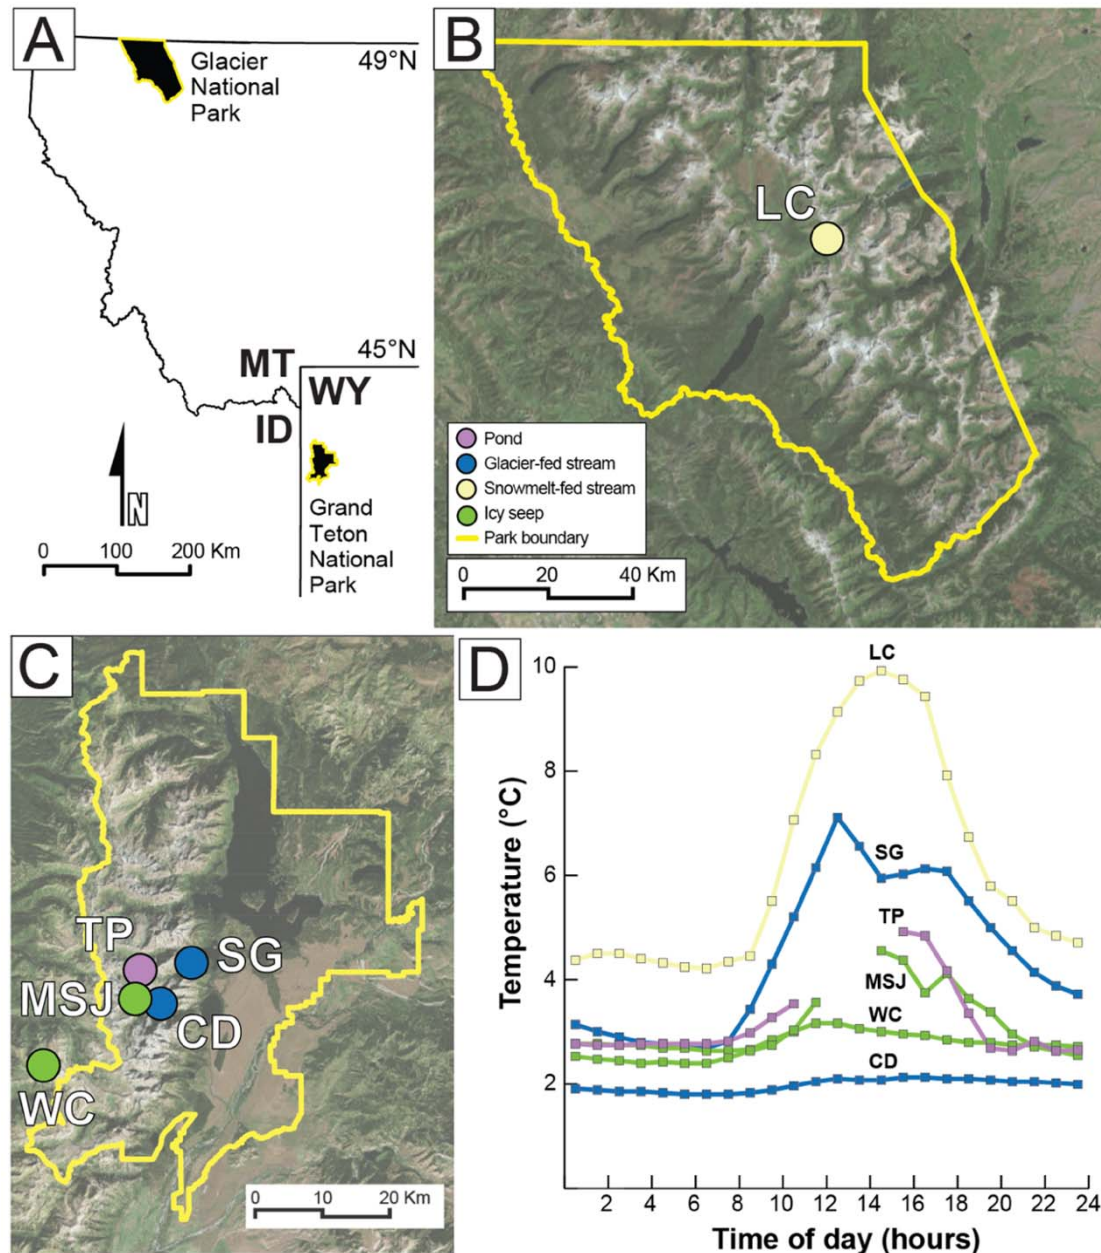

**Figure 1.** (A) The region of the Rocky Mountains where this study was conducted including (B) Glacier National Park, MT and (C) Grand Teton National Park, WY and the surrounding region. (D) A thermograph of hourly temperatures for each study site in late July. Site acronyms (top to bottom): Lunch Creek (LC), Skillet Glacier (SG), Tetonica Pond (TP), Mt. St. John (MSJ), Wind Cave (WC), and Cloudveil Dome (CD). A complete 24-hour thermograph is not shown for MSJ and TP because only 21 and 19 hours of continuous data were recorded for those sites, respectively. More extensive thermal data are provided in Figure S1.

## Environmental data and aquatic habitat classifications

For each study stream, we measured temperature by placing *in situ* HOBO loggers (Temperature Pro v2, Onset Computer Corporation) that recorded temperature hourly. Lengths of logger deployments ranged from less than 24 hours (Mt. St. John, Tetonica Pond) to several days (Cloudveil Dome) or a full year (Lunch Creek, Skillet Glacier, Wind Cave). Using these data, we constructed a one-day thermograph for each site based on a representative day in late July (exact dates provided in Table S1) and estimated the highest ( $T_{MAX}$ ), range ( $T_{RANGE}$ ), and mean ( $T_{MEAN}$ ) temperatures for that day. For two sites with more than one year of temperature data (Wind Cave: 2016, 2019; Lunch Creek: 2012, 2013, 2014), we compared multiple complete thermographs for July to ensure that our results were not biased by an unusual year- or day-specific pattern (Figure S1). We also collected two additional environmental variables to inform our habitat classifications (see below): specific conductivity (SPC), measured with a YSI Professional ProPlus multiparameter probe which was calibrated at the trailhead before each sampling trip, and stream channel stability, calculated via a modified version of the Pfankuch Index (PI), a standard metric for assessing channel stability in mountain systems that integrates five key physical characteristics of the stream into a single value (Peckarsky *et al.*, 2014).

We classified sites into habitat types following previous studies (Giersch *et al.*, 2017, Hotaling *et al.*, 2019a, Tronstad *et al.*, 2019). Briefly, we incorporated a site's primary hydrological source, environmental variation, and geomorphology, to group them into one of four habitat types: streams fed by a surface glacier ("glacier-fed"), a perennial snowfield ("snowmelt-fed"), emanating from subterranean ice (e.g., rock glaciers, "icy seep"), or slow-flowing, alpine ponds ("pond"). We categorized a stream as glacier-fed if it had a named glacier upstream and an extremely unstable streambed ( $PI > 30$ ). Any other streams fed by permanent surface snow were categorized as snowmelt-fed. We classified streams as icy seeps if we observed evidence of a subterranean ice source (e.g., lobes of a rock glacier), they were extremely cold (e.g.,  $T_{MAX} < 5^{\circ}C$ ), and had high conductivity ( $SPC > 50$ ; Hotaling *et al.*, 2019a). Ponds were identified by their low-angle profile and the presence of standing water.

**Table 2.** Morphological and physiological data included in this study. Holding: time (hours) that specimens were held at 3°C with no access to food before testing. *N*: sample size for each population. Mean body lengths were used as a proxy for mass and are reported in millimeters with standard errors. RNAseq: sample sizes for RNA sequencing for treatment (T; CT<sub>MAX</sub>) and control (C; held at 3°C) specimens. Mean CT<sub>MAX</sub> is given in degrees Celsius.

| Population      | Taxon              | Length    | Holding | <i>N</i> | Mean CT <sub>MAX</sub> | RNAseq  |
|-----------------|--------------------|-----------|---------|----------|------------------------|---------|
| Lunch Creek     | <i>L. tumana</i>   | 4.9 ± 0.5 | 72      | 24       | 28.7                   | 3T / 3C |
| Wind Cave       | <i>Zapada</i> sp.  | 4.4 ± 0.6 | 48      | 23       | 25.9                   | --      |
| Mt. St. John    | <i>L. tetonica</i> | 5.6 ± 0.7 | 12      | 24       | 26.6                   | 3T / 3C |
| Cloudveil Dome  | <i>L. tetonica</i> | 4.5 ± 0.5 | 12      | 23       | 26.1                   | --      |
| Skillet Glacier | <i>L. tetonica</i> | 5.6 ± 0.4 | 12      | 17       | 28.6                   | --      |
| Tetonica Pond   | <i>L. tetonica</i> | 4.6 ± 0.6 | 12      | 23       | 28.6                   | 3T / 3C |

### Measuring critical thermal maxima (CT<sub>MAX</sub>)

Nymphs were brought into the laboratory as quickly as possible (typically less than 12 hours after collection) and transferred to holding chambers in 150-quart coolers filled with water from a nearby stream (Pacific Creek: 43.9036°, -110.5892°). We used aquarium chilling units (1/10 HP, Coralife) to maintain the holding baths at ~3°C (Figure S2). Each holding chamber contained 12 nymphs in a ~2 L plastic container immersed such that both water and nymphs were isolated from the rest of the system. We included plastic mesh squares in each chamber to give nymphs substrate to cling to. We maintained high levels of water flow and dissolved oxygen by air stone bubbling in each chamber. Nymphs had no access to food during the holding period to ensure they were tested in a fasting state (i.e., after available food had been digested and absorbed). All nymphs were held for at least 12 hours before testing (Table 2).

We measured CT<sub>MAX</sub>, a survivable temperature at which nymph locomotor function becomes disorganized. We placed up to 12 nymphs in individual mesh chambers in a water bath held at 3°C. Flow and oxygenation were maintained with pumps. Four thermo-electric cooling (TEC) plates attached to a temperature controller were used to increase temperature at ~0.25°C per minute. We recorded CT<sub>MAX</sub> when an individual nymph could no longer right itself after being turned onto its back (Videos S1-S2). After a nymph reached its CT<sub>MAX</sub>, we transferred it to an 8°C bath for recovery and assessed survival by monitoring nymphs until they resumed normal movement. Nymphs were later preserved in ~95% ethanol. We measured body length (top of head to base of tail) to the nearest ¼ mm using a dissecting microscope and a millimeter grid attached to the base of the microscope. A subset of nymphs were flash frozen at either their CT<sub>MAX</sub> or holding temperature for RNA sequencing (RNAseq).

For CT<sub>MAX</sub>, all statistical analyses were conducted in R v3.4.0 (R Core Team, 2013). Our data set provided a unique opportunity to compare CT<sub>MAX</sub> across multiple populations of



confamilial species distributed in cold, headwater streams. Because we did not have replicate populations for *L. tumana* and *Z. glacier*, we did not conduct a species-level comparison. We first analyzed the effect of body size (length) on  $CT_{MAX}$  with a general linear model that included  $CT_{MAX}$  as the response variable with a length x stream interaction term as the predictor variable. We split sites into cold ( $T_{MAX} \leq 4.6^{\circ}C$ ) and warm ( $T_{MAX} \geq 4.9^{\circ}C$ ) categories based on a natural delineation in the  $CT_{MAX}$  data (Figure 2A). We are confident the delineation is a conservative estimate of true thermal differences between the groups because the warmest of the cold sites, Mt. St. John, is a steep, fast-flowing stream and is likely minimally influenced by solar radiation. In comparison, Tetonica Pond, the coldest of the warm sites, is a slow-moving mountain pond that likely reaches temperatures beyond the maximum ( $4.9^{\circ}C$ ) we observed in just 19 hours of monitoring. To test if mean  $CT_{MAX}$  differed between groups, we performed a two-sample Welch's *t*-test.

### RNA sequencing

During the thermal tolerance experiment, a subset of individuals from three populations and both *Lednia* species (Lunch Creek, *L. tumana*; Mt. St. John and Tetonica Pond, *L. tetonica*; Figure 1A, Table 2) were sampled for RNAseq. Nymphs at their  $CT_{MAX}$  (treatment) and others that remained at the holding temperature (control) were flash frozen in liquid nitrogen. We sampled three treatment and three control nymphs for each population ( $N = 18$  total; Table 2). Samples were stored in liquid nitrogen until they were transferred to a  $-80^{\circ}$  freezer. We extracted total RNA from entire nymphs following the NucleoSpin RNA (Macherey-Nagel Inc.) protocol. For extraction, specimens were re-flash frozen with liquid nitrogen in a 1.5 mL microcentrifuge tube and ground into a fine powder with a sterilized pestle. We quantified RNA with a Qubit 2.0 fluorometer (Thermo Fisher Scientific) and assessed RNA extraction quality via fragment analysis with an ABI 3730 DNA Analyzer (Thermo Fisher Scientific).

We prepared RNAseq libraries from 1  $\mu g$  of total RNA with the NEBNext Poly(A) mRNA Magnetic Isolation Module (NEB) according to the manufacturer protocol. We targeted a 300-450 basepair (bp) fragment size distribution. For cDNA amplification, fifteen PCR cycles were used for all libraries. Presence of a PCR product was visually assessed using an eGel (Thermo Fisher Scientific). Final libraries were quantified with a Qubit 2.0 fluorometer and further assessed for quality, amount of cDNA, and fragment size distribution using a 2100 BioAnalyzer with the High Sensitivity DNA Analysis kit (Agilent). Libraries were then pooled in equal nanomolar concentrations and sequenced on one lane of an Illumina HiSeq4000 with 100 bp

paired-end chemistry by the Roy J. Carver Biotechnology Center at the University of Illinois Urbana-Champaign.

### *Gene expression analyses and protein annotation*

We assessed raw sequence data quality with fastQC v0.11.4 (Andrews, 2010) and visualized a combined output for all libraries with MultiQC v1.5 (Ewels *et al.*, 2016). Next, we trimmed reads in three successive rounds, all with Trim Galore! v0.4.1 (Krueger, 2015) and default settings except as noted. First, we removed adapter sequences (--illumina --stringency 6). Next, we trimmed for quality and poly-A tails (--quality 20 --stringency 6 --adapter A{30} --adapter2 A{30}). We then trimmed for poly-T tails and discarded reads that had become too short (--stringency 6 --length 50 --adapter T{30} --adapter2 T{30}). We then assessed the quality of the trimmed reads with fastQC v0.11.4. We randomly subsampled one library (Library 3; Control, Mt. St. John) to 80% of its original amount because its sequencing depth was much higher than the rest of the data set. For this, we used the reformat function of BBTools v37.80 (Bushnell, 2014). We removed one library (Library 9; Control, Mt. St. John) from all downstream analyses as it had just 2.6 million reads, far fewer than any other library (see Results).

We mapped reads to the *L. tumana* reference genome (GenBank #QKMV000000000.1) with the mitochondrial genome (GenBank #MH374046; Hotaling *et al.*, 2019c) appended to it. We used HiSat2 v2.1.0 (Pertea *et al.*, 2015) with default settings, first building an index of the reference with the hisat2-build command. To ensure no bias was introduced by differential mapping rates between *L. tumana* and *L. tetonica* samples to the *L. tumana* reference genome, we compared the mean mapping rates for both species with an unpaired *t*-test. Because HiSat2 outputs unsorted SAM files, we converted the output to sorted BAM files with samtools v1.7 (Li *et al.*, 2009).

We generated a gene count matrix for each library with StringTie v1.3.5 (Pertea *et al.*, 2015). We first ran StringTie with the default settings to assemble alignments into potential transcripts without a reference annotation (-G) because none is available for *L. tumana*. Next, we used the --merge utility to combine library-specific sets of transcripts into a merged, putatively non-redundant set of isoforms. This tool outputs a merged Gene Transfer Format (GTF) file. We then re-ran StringTie using the merged GTF (-G) and the flags -B and -e to enable the output of Ballgown GTF files for the global set of transcripts shared by all samples. Next, we ran the prepDE.py script, also part of the StringTie package, to generate counts matrices for all genes and transcripts identified in the previous steps.

We performed differential expression analyses using edgeR v3.26.8 (Robinson *et al.*, 2010) in R version 3.5.2 (R Core Team, 2013). We filtered our data set by requiring transcripts to have more than five total reads and to be present in at least two samples. To compare expression variation across groups of interest (i.e., treatments, species, and populations), we used the plotPCA function. After filtering, we identified structure in global gene expression that could not be explained by sample preparation, library size, species, population, or treatment (Figure S3). We removed this unwanted variation with RUVseq v1.18.0 (Risso *et al.*, 2014). Specifically, we used the “*in silico* empirical” functionality of RUVg where a set of the least differentially expressed genes (DEGs) are identified and used as controls to globally normalize variation in the data set. We used the default trimmed mean of M-values (TMM) method to normalize the data and calculate effective library sizes (Figure S4). Dispersions were estimated using a generalized linear model and a Cox-Reid profile-adjusted likelihood (McCarthy *et al.*, 2012). We identified DEGs with quasi-likelihood F-tests (Lun *et al.*, 2016) which were run using contrasts. We performed DEG identification across three levels of comparison: (1) Within-populations between treatment (collected at their CT<sub>MAX</sub>) and control (held at 3°C) specimens. (2) Between treatment and control for *L. tetonica* specimens only (Mt. St. John and Tetonica Pond). (3) Between treatment and control for all specimens. A false discovery rate (FDR)  $\leq 0.05$  was used to identify DEGs.

To annotate our data set, we extracted the longest isoform for each gene using the CGAT toolkit and the ‘gtf2gtf’ function (Sims *et al.*, 2014). We then extracted genes from the file containing the longest isoforms with gffread v.0.9.9 (Trapnell *et al.*, 2012). We performed a blastx search of each gene (E-value: 0.001) against the SwissProt database (Boeckmann *et al.*, 2003; accessed 15 April 2019). Using the results of our blastx search, we annotated genes, retrieved gene ontology (GO) terms, and mapped GO terms using Blast2GO v5.2 (Conesa *et al.*, 2005). We annotated DEGs with the top BLAST hit per transcript. For DEGs without a match in the SwissProt database, we performed a subsequent batch search against the RFAM database using the online portal (Kalvari *et al.*, 2017; <http://rfam.org/search>). We performed GO term enrichment analyses on two test sets with one-tailed Fisher’s Exact Tests and FDR  $\leq 0.05$  after correcting for multiple tests: (1) upregulated genes for *L. tetonica* only and (2) downregulated genes for *L. tetonica* only. We did not perform GO term enrichment analysis for *L. tumana* because no DEGs were identified for the representative population we examined (Lunch Creek; see Results). We also did not perform GO term enrichment on the overall *Lednia* data set because of redundancy with the *L. tetonica* analysis (i.e., roughly two-thirds of the

same individuals would be included). For enrichment analyses, the complete set of transcripts with BLAST hits were used as the reference set.

To test if stoneflies from more thermally variable environments have muted cellular responses to stress, we identified all genes annotated as heat shock proteins based on BLAST hit descriptions. Next, we sorted these genes by their overall expression [log counts per million (logCPM)] and filtered them to a final set using two criteria: (1) We only included genes expressed at moderate to high levels ( $\geq 4$  logCPM) and (2) only retained the most expressed hit (highest mean logCPM) for each unique gene. We did this to prevent any potential bias due to one gene being represented by multiple hits (see Results). Next, we calculated the mean difference in logCPM between treatment and control nymphs for each gene and population. Because the data were not normally distributed ( $P$ , Shapiro-Wilk  $< 0.001$ ), we compared the distributions of mean differences for each population using a Kruskal-Wallis rank sum test followed by a Dunn test for multiple comparisons. All scripts and commands used in this study are available on GitHub ([https://github.com/scotthotaling/Lednia\\_RNAseq](https://github.com/scotthotaling/Lednia_RNAseq)).

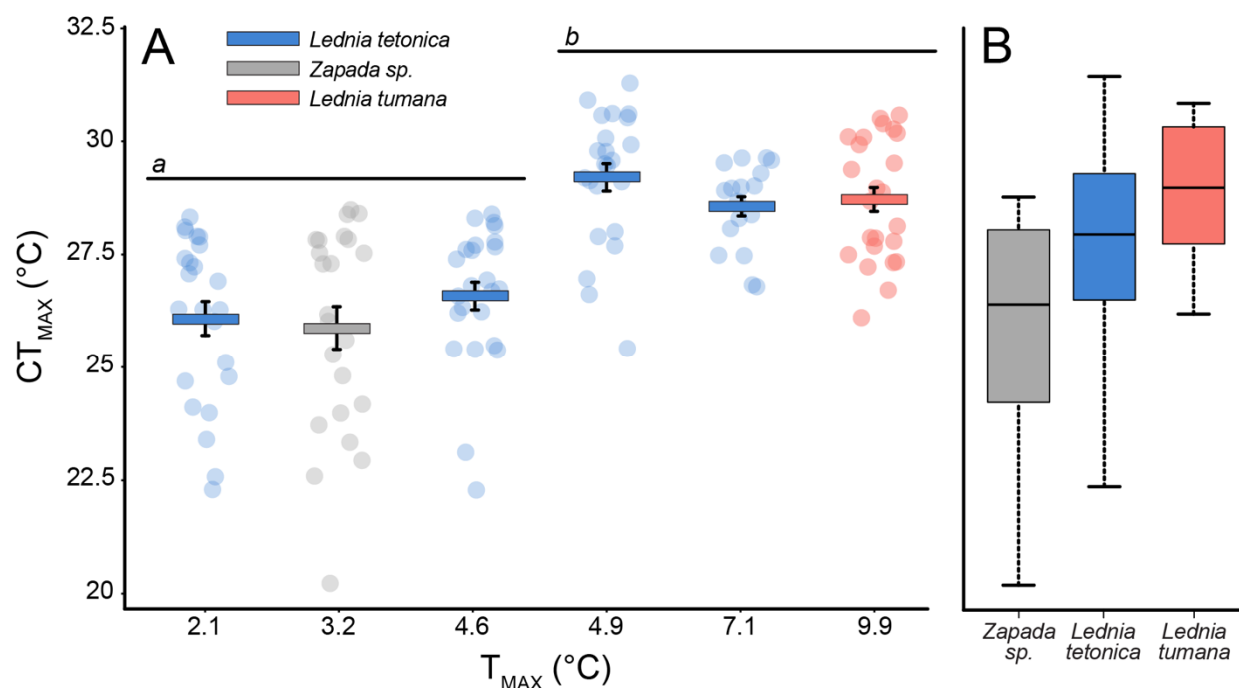

**Figure 2:** (A)  $CT_{MAX}$  versus maximum stream temperature ( $T_{MAX}$ ) for each nymph (circles) with means for each population (rectangles). Bars represent standard errors. Stoneflies from colder streams ( $T_{MAX} < \sim 5^{\circ}C$ ) had lower  $CT_{MAX}$  values than those from warmer streams ( $T_{MAX} > \sim 5^{\circ}C$ ). Lower-case italic letters reflect significant differences in  $CT_{MAX}$  between groups ( $P$ , Welch's  $t$ -test  $< 0.001$ ). (B) Box plots of variation in  $CT_{MAX}$  across species. Black horizontal lines in each box indicate the median with lower and upper bounds of the box representing the lower and upper quartiles of the data, respectively. Whiskers show the maximum and minimum values.

# Results:

## Environmental data and species collection

We identified one snowmelt-fed stream (Lunch Creek: GNP), two icy seeps (Wind Cave, Mt. St. John; GRTE), two glacier-fed streams (Cloudveil Dome, Skillet Glacier; GRTE), and one alpine pond (Tetonica Pond; GRTE; Table 1). We collected *L. tumana* from Lunch Creek, *Zapada* sp. from Wind Cave, and *L. tetonica* from the other four sites (Figure 1, Table 1). Lunch Creek was the warmest ( $T_{\text{MEAN}} = 6.2^{\circ}\text{C}$ ;  $T_{\text{MAX}} = 9.9^{\circ}\text{C}$ ) and most thermally variable ( $T_{\text{RANGE}} = 5.7^{\circ}\text{C}$ ) site we sampled (Table 1). Cloudveil Dome ( $T_{\text{MAX}} = 2.1^{\circ}\text{C}$ ) and Wind Cave ( $T_{\text{MAX}} = 3.2^{\circ}\text{C}$ ) were the coldest and least variable sites ( $T_{\text{RANGE}} \leq 0.5^{\circ}\text{C}$ ; Table 1). Icy seeps were the coldest and least thermally variable habitat type overall ( $T_{\text{MAX, icy seeps}} = 3.9^{\circ}$ ;  $T_{\text{RANGE, icy seeps}} = 1.4^{\circ}\text{C}$ ). For the two sites with two or more years of temperature data available (2 years, Wind Cave; 3 years, Lunch Creek), thermal differences across years were negligible (Figure S1).

## Thermal physiology

We confirmed that all nymphs survived the  $\text{CT}_{\text{MAX}}$  treatment (except for those that were immediately flash frozen for RNAseq and could not be assessed). We found no effect of body length on  $\text{CT}_{\text{MAX}}$  ( $P = 0.28$ ) and therefore did not include it as a covariate in our statistical model (Figure S5). We did, however, observe differences in  $\text{CT}_{\text{MAX}}$  among populations (Figure 2A). Stoneflies inhabiting colder sites ( $T_{\text{MAX}} < \sim 5^{\circ}\text{C}$ ) exhibited lower  $\text{CT}_{\text{MAX}}$  values compared to those from warmer sites ( $T_{\text{MAX}} > \sim 5^{\circ}\text{C}$ ). Indeed, mean  $\text{CT}_{\text{MAX}}$  for the ‘cold’ group was  $\sim 2.5^{\circ}\text{C}$  lower than the ‘warm’ group (Mean  $\text{CT}_{\text{MAX, cold}} = 26.2^{\circ}\text{C}$ ; mean  $\text{CT}_{\text{MAX, warm}} = 28.7^{\circ}\text{C}$ ;  $P$ , Welch’s  $t$ -test  $< 0.001$ ). At the population level, we observed the lowest  $\text{CT}_{\text{MAX}}$  for *Zapada* sp. nymphs from Wind Cave (mean  $\text{CT}_{\text{MAX}} = 25.9^{\circ}\text{C}$ ) and the highest for *L. tumana* from Lunch Creek (mean  $\text{CT}_{\text{MAX}} = 28.7^{\circ}\text{C}$ ; Table 2). Although we could not statistically test differences in  $\text{CT}_{\text{MAX}}$  among species due to a lack of species-level replicates for *L. tumana* and *Zapada* sp., our results suggest that  $\text{CT}_{\text{MAX}}$  may be highest for *L. tumana* (Figure 2B). However, this finding may simply be reflective of the only *L. tumana* population sampled also being from Lunch Creek, the warmest stream included in this study.

## RNA sequencing and annotation

We generated 368.8 million read pairs for 18 libraries with a mean per sample of 20.6 million  $\pm 1.9$  million (min. = 2.6 million, max. = 39.2 million). After filtering, subsampling of the library with the most reads, and dropping the library with the fewest reads, we retained 354.1 million read pairs. On average, 85.2% of reads mapped to the *L. tumana* reference genome with



*L. tumana* libraries mapping at a slightly higher rate (mean  $89.0\% \pm 0.5\%$ ; min. = 87.8%, max. = 91.0%) than *L. tetonica* (mean =  $83.2\% \pm 0.6\%$ ; min. = 81.0%, max. = 84.5%; *P*, *t*-test < 0.0001). However, this difference in mapping rate did not extend to a difference in total reads mapped (mean, *L. tumana* = 19.2 million, mean *L. tetonica* = 21.7 million; *P*, *t*-test = 0.42). Raw reads for this study are deposited on the NCBI SRA under BioProject #PRJNA587097.

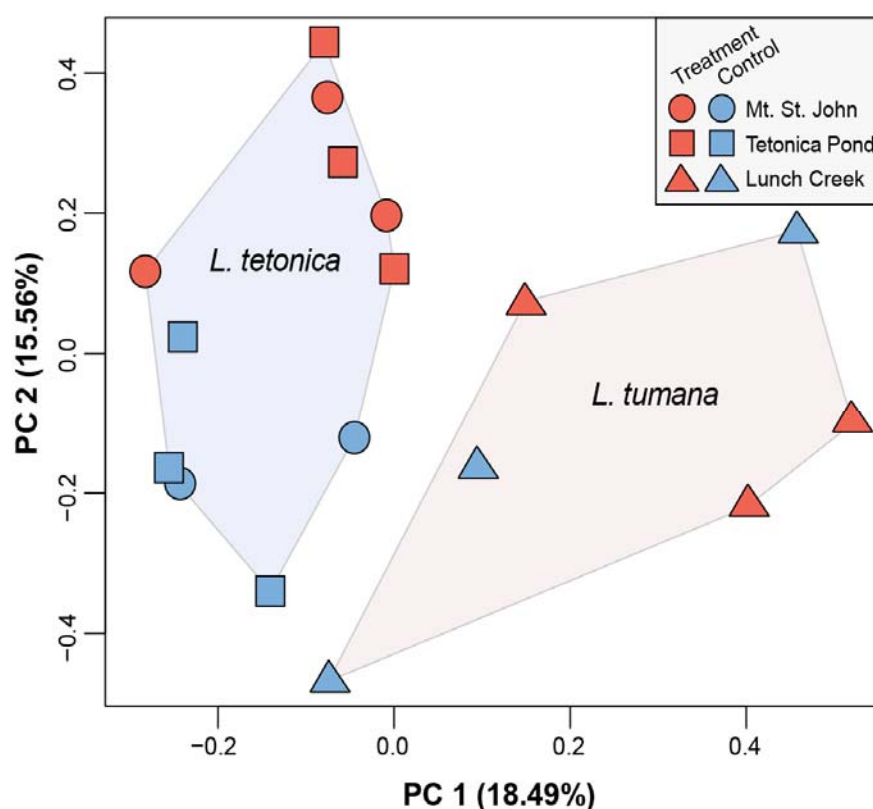

**Figure 3.** Global differences in gene expression for stonefly nymphs color-coded by treatment (red, CT<sub>MAX</sub>) or control (blue, held at 3°C) and grouped by species (colored polygons) and populations (shapes).

### Differential expression

After filtering and processing of the data set, our gene counts matrix contained 52,954 unique entries. We observed global differences in gene expression between *L. tumana* and *L. tetonica* (Figure 3). When *L. tumana* and *L. tetonica* were combined (“*Lednia*”), 80 genes were differentially expressed: 65 upregulated and 15 downregulated in the treatment (CT<sub>MAX</sub>) versus control group (FDR ≤ 0.05). When only *L. tetonica* populations were considered (“*Tetonica*”), 71 genes were differentially expressed: 60 upregulated, 11 downregulated. Thirty-four DEGs were shared between groups (32 upregulated, two downregulated). When each population was

considered alone, no DEGs were identified (including for Lunch Creek, the only *L. tumana* population). While we report results for the *Lednia* and *Tetonica* data sets above, we focus hereafter on *Tetonica* because it contains the most statistical power (two populations) with no potential for species-specific bias. Furthermore, due to the fragmented nature of the *L. tumana* genome (contig N50: 4.7 kilobases (kb); 74,445 contigs > 1 kb; Hotaling *et al.*, 2019c), portions of the same gene were likely present on different contigs in the reference. When we assembled transcripts, this manifested as unique transcripts annotated to the same gene. Thus, in many instances (e.g., hexamerins, *HEXA*; Figures 4, S6), we recovered multiple independent hits to the same gene. While multiple hits may reflect biological reality (e.g., more than one copy of a gene in the genome perhaps reflecting a gene family expansion) we cannot draw such a conclusion. We specify how multiple hits to the same gene were handled where appropriate.

For *Tetonica*, 46 DEGs (64.8%) had BLAST hits, 32 of which were unique (Table S2). Of the remainder, three DEGs (4.2%) had hits to the RFAM database. The most upregulated gene [MSTRG.32248; log<sub>2</sub> fold change (logFC) = 15.6; FDR = 0.015] had no annotation (Figure 4). However, the next four most-upregulated genes (logFC = 7-9.1; Figure 4) included *ABCA3*, which binds ATP, a nucleolysin (*TIAR*), and two heat shock proteins *HSP74* and *HSP71*. The two heat shock proteins were also the most expressed DEGs (logCPM = 8.9 and 9.3, respectively) after three genes which were all annotated as hexamerins (*HEXA*; logCPM = 9.3-10). Fourteen DEGs had hits to the same apolipoprotein gene, *APLP*, with relatively similar changes in expression (logFC, *APLP* = 2.1-3.8; Figure S6) and overall expression levels (logCPM, *APLP* = 2.2-6.9). The three most downregulated genes did not have BLAST hits [logFC = -6.5 to -13.6; Figure 4].

Forty-one GO terms were enriched in the upregulated *Tetonica* data set (Figure S7): 26 were classified as being part of a biological process ontology, three were cellular component related, and 11 were linked to molecular function. The top four most significantly enriched GO terms were all lipid-related, including their transport, binding, and localization. Eight of the enriched GO terms (19.5% overall) were associated with protein folding, and three were linked to chaperone proteins which are commonly associated with physiological stress (Beissinger & Buchner, 1997). In the same vein, one enriched GO term “heat shock protein binding” (GO:0031072; FDR = 0.015), clearly reflected a link to heat stress at the cellular level. No GO terms were enriched for downregulated *Tetonica* DEGs.

#### *Environmental variability and gene expression*

Across all populations and species, 38 genes were annotated as heat shock proteins (HSPs). Of these, 12 unique genes were expressed at moderate to high levels ( $\log\text{CPM} \geq 4$ ; Figure S8). We found no support for our hypothesis that stoneflies naturally experiencing higher (and more variable) temperatures exhibit muted cellular stress responses versus those inhabiting colder (and more thermally stable) streams (Figure 5;  $P$ , Dunn's  $\geq 0.66$ ).

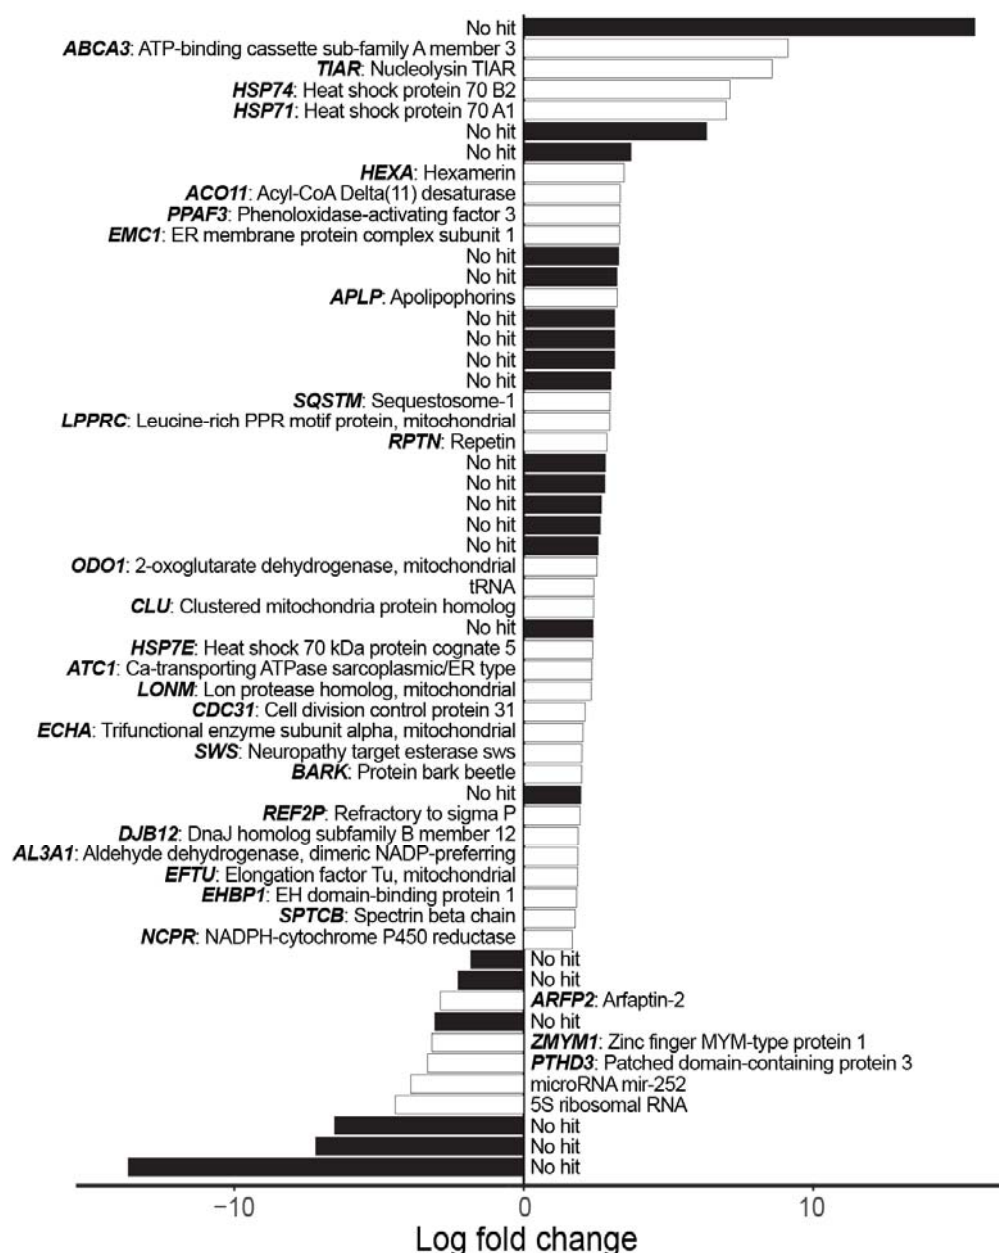

**Figure 4.** Log fold change of *Lednia tetonica* DEGs (white = BLAST annotated; black = no hit;  $\text{FDR} \leq 0.05$ ). For annotated genes, only the hit with the lowest FDR is included. The full version of this figure, including hits to the same protein, is provided in Figure S6.

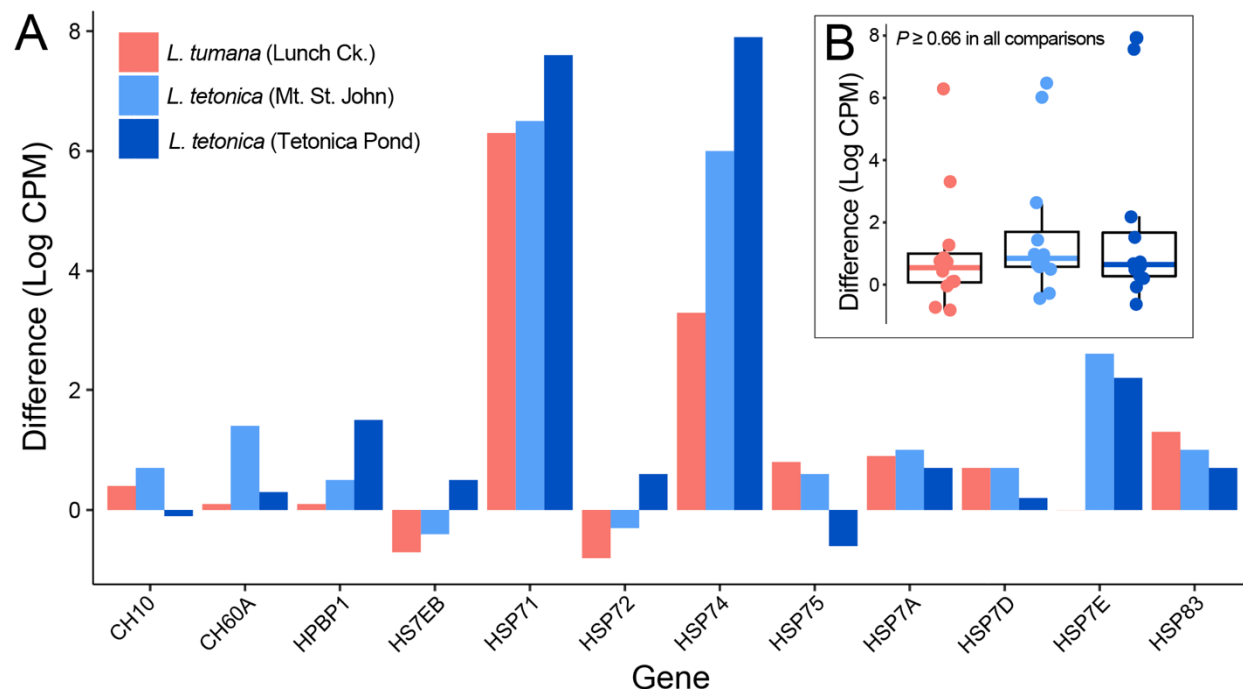

**Figure 5.** (A) Mean population-level differences in expression between treatment and control specimens for the 12 most highly expressed, unique HSPs annotated in this study. (B) Distributions of the values in (A) grouped by population. No significant differences were present ( $P$ , Dunn  $< 0.05$ ).

## Discussion:

As climate change proceeds, headwaters will be dramatically altered by the reduction or loss of meltwater from glaciers and perennial snowfields (Hotaling *et al.*, 2017). However, the physiological limits of aquatic, high-elevation species, a group of organisms presumed to be acutely imperiled by climate change, remain largely unknown (but see Shah *et al.*, 2017b). In this study, we explored the thermal physiology of high-elevation stoneflies inhabiting the meltwater of rapidly fading glaciers and snowfields in the Rocky Mountains. Our focal species are representative of an entire community that may be at risk of climate-induced extirpation (Giersch *et al.*, 2017, Hotaling *et al.*, 2019a, Tronstad *et al.*, 2019), and included *L. tumana*, a species listed under the U.S. Endangered Species Act due to climate-induced habitat loss (U.S. Fish & Wildlife Service, 2019). We show that habitat conditions, specifically maximum temperatures, predict upper thermal limits and that nymphs mount a cellular stress response when faced with heat stress. Contrary to our expectations, however, we saw no link between the scale of the stress response and natural conditions nymphs experience. That is, stoneflies from warmer environments did not exhibit a muted cellular stress response across HSPs versus those from cooler streams. Our results shed new light on thermal tolerance of mountain

stoneflies and complement recent cellular perspectives on aquatic insect thermal biology (Ebner *et al.*, 2019, Gamboa *et al.*, 2017). Broadly, our findings and those of others (e.g., Ebner *et al.*, 2019, Shah *et al.*, 2017b, Treanor *et al.*, 2013), challenge the prevailing notion that aquatic insects living in extremely cold mountain streams cannot survive warming. For *Lednia*, with the ability to tolerate short-term temperatures that likely exceed anything they naturally experience by more than ~10°C, we hypothesize that their headwater distributions are actually a product of other mechanisms (e.g., species interactions at lower elevation) paired with a unique capacity to develop at near freezing temperatures.

#### *Thermal tolerance*

In mountain systems, thermal tolerance is important to organismal distributions. Previously, it has been shown to explain the elevational limits of many terrestrial taxa (Andrews, 1998, Brattstrom, 1968, Feder & Lynch, 1982, Huey & Webster, 1976), but whether it also explains limits of aquatic taxa is unknown. Our study shows that species of high-elevation stoneflies in the Rocky Mountains, often described as cold stenotherms that are highly susceptible to warming (e.g., Giersch *et al.*, 2017), can withstand short-term temperatures much higher than those experience in nature (see also Shah *et al.*, 2017b). While the ecological relevance of CT<sub>MAX</sub> has been questioned due to its sensitivity to ramping rates, as well as acclimation and starting temperatures (Rezende *et al.*, 2011, Terblanche *et al.*, 2011), the assay may be uniquely appropriate for mountain stream taxa. Indeed, many mountain streams naturally experience rapid increases in temperature throughout the day (e.g., Lunch Creek, Figure 1D) and reduced summer streamflows under climate change (Huss & Hock, 2018) are likely to elevate baseline temperatures and exacerbate intraday temperature spikes as meltwater volume declines and its buffering capacity is lost.

We also observed population-level CT<sub>MAX</sub> variation within *L. tetonica*, suggesting that *local* thermal regime is more important to thermal tolerance than regional thermal regime, and echoing the findings of other recent studies (Gutiérrez-Pesquera *et al.*, 2016, Shah *et al.*, 2017b). Furthermore, this effect of local conditions on thermal tolerance outweighs differences that arise from evolutionary history because all species (e.g., *Lednia tetonica* and *Zapada* sp.) from cooler streams had lower CT<sub>MAX</sub> than those from warmer streams (Figure 2). While we cannot determine if thermal variation among populations represents evolved differences, all specimens were held in a common thermal regime for at least 12 hours to limit the effects of previous thermal conditions on CT<sub>MAX</sub> estimates. Regardless of the mechanism, the high-elevation stoneflies included in this study appear poised to cope with warming in streams, at



least for short periods, although some populations are likely to be more resilient than others (e.g., those experiencing higher present-day maximum temperatures). However, the extent to which warming affects fitness-related traits like growth and egg production, and how the potential for seasonal  $CT_{MAX}$  plasticity to interact with warming temperatures, remain largely unknown and represent a pressing arena for future research.

### Gene expression

High-elevation stoneflies residing in extremely cold meltwater-fed streams exhibited a cellular stress response when faced with temperatures at their  $CT_{MAX}$ . The bulk of this response was comprised of upregulated genes and included well-known stress response genes (e.g., HSPs; Lindquist & Craig, 1988), lesser known but potentially stress-related genes in insects (e.g., APLP, Dassati *et al.*, 2014), and many DEGs that could not be annotated (Figure 4). Three HSPs (*HSP74*, *HSP71*, *HSP7E*) were upregulated in nymphs experiencing thermal stress. With well-established roles as cellular protectants, preventing protein denaturation, binding aberrant proteins, and many other stress-induced measures, the upregulation of HSPs was unsurprising (King & MacRae, 2015). However, given the seemingly psychrophilic lifestyle of *Lednia*, where individuals develop at temperatures near 0°C, we expected to see widespread upregulation of HSPs in treatment nymphs. This was not the case. Rather, *Lednia* appeared to constitutively express many HSPs even at low temperature (Figure S8). This suggests that, contrary to popular opinion, exposure to low temperatures may actually stress *Lednia* (see additional discussion below). Similar patterns of constitutive HSP expression has been observed in other cold-tolerant species. For instance, larval caddisflies (Ebner *et al.*, 2019), polar fish (Buckley *et al.*, 2004), and even Antarctic grass (Reyes *et al.*, 2003) constitutively express many HSPs, presumably to chaperone proteins at low temperature. The potential for *Lednia* to be stressed by cold temperatures is further supported by the inability of *L. tumana* nymphs to tolerate being enclosed in ice (Hotaling *et al.*, In review).

While heat stress is presumed to drive the expression patterns we observed, aquatic insects accelerate their development and emerge earlier at warmer temperatures (Nebeker, 1971, Rempel & Carter, 1987), sometimes even during  $CT_{MAX}$  experiments (A.A.S., personal observation). Thus, some expression changes may be the result of developmental shifts rather than thermal stress directly. Indeed, when subjected to long-term (~1 month), temperatures above those they experience in nature (e.g.,  $\geq 15^{\circ}\text{C}$ ), *Lednia tumana* nymphs rapidly develop. However, emerging adults often get stuck while shedding their cuticle and die in the process (S.H. and A.A.S., unpublished data). Some of our results appear more reflective of this

developmental shift than heat stress directly. For instance, it has been suggested that *ABCA3* is upregulated during insect wing development (Broehan *et al.*, 2013). In our study, high temperatures induced upregulation of *ABCA3*, perhaps indicating accelerated wing development in preparation for emergence as winged adults.

The upregulation of *HEXA* raises similar, albeit more complex, questions. Stoneflies possess two types of hexameric proteins in their hemolymph: hemocyanin (*HCYD*), an oxygen-carrying protein, and hexamerins, multi-functional proteins that likely evolved from hemocyanin (Amore *et al.*, 2011, Hagner-Holler *et al.*, 2007). We saw some evidence for the upregulation of *HCYD* in heat-stressed stoneflies (Figure S9), perhaps reflecting the physiological challenges of extracting the necessary oxygen from warmer water. However, while hexamerins likely evolved from *HCYD*, their function shifted to storage proteins after they lost the ability to bind oxygen (Burmester, 2015, Markl & Winter, 1989). Hexamerins primarily act as sources of amino acids during non-feeding periods (e.g., emergence, Haunerland, 1996) but may also play a role in cuticle formation (Burmester, 2015, Hagner-Holler *et al.*, 2007), a key stage in aquatic insect emergence. Thus, the upregulation of *HEXA* may be another cellular indicator of accelerated emergence to escape injurious conditions.

#### *Mountain stream insects as cold stenotherms: reconsidering a historical paradigm*

Aquatic insects living in chronically cold habitats have long been assumed to be cold-loving stenotherms that are intolerant of warming (e.g., Giersch *et al.*, 2017, Jacobsen *et al.*, 2012). This assumption has rarely, if ever, been supported by direct measurements. A potential mismatch between theory and data is particularly important for imperiled species. *Lednia tumana* is federally endangered under the U.S. Endangered Species Act due to loss of cold, meltwater habitat (U.S. Fish & Wildlife Service, 2019). As glaciers disappear around the world (Huss & Hock, 2018), the demise of *Lednia* and similar species (e.g., *Zapada* sp.) is presumed to be merely a matter of time (Giersch *et al.*, 2017). While this may be true, alternative hypotheses or threats beyond temperature should be considered. Chief among these is the question of niche breadth. Factors limiting niche breadth are diverse and may not be directly linked to temperature (e.g., interspecific competition or food availability, Connell, 1961, Roughgarden, 1974), although thermal sensitivity can certainly play a major, interactive role (Gilchrist, 1995). While terrestrial habitats exhibit a wide array of thermal variation, potentially allowing more thermal space for species with similar ecologies to exist in sympatry, the buffering capacity of flowing water may reduce the diversity of thermal niches in streams across similar spatial extents. Thus, with relatively high short-term thermal tolerance, far exceeding

temperatures experienced in nature, and cellular signatures of stress even at low temperatures (e.g., constitutive expression of HSPs at 3°C), we hypothesize that the distribution of *Lednia* and similar species reflects not a requirement for cold conditions but simply a greater tolerance for them versus other species. Rather than being an extreme thermal specialist, *Lednia* may have evolved a wide thermal niche that allows it to colonize environments free of limiting biological factors. Our hypothesis aligns with previous experimental evidence highlighting the potential for biotic factors beyond temperature to alter alpine stream ecosystems (Khamis *et al.*, 2015).

When considering climate change impacts on mountain stream biodiversity, it is important to distinguish between a species being imperiled by rising temperatures or biotic factors. At present, the prevailing theory is that a warmer water community will shift uphill and displace coldwater taxa as glaciers and perennial snowfields are lost (Hotaling *et al.*, 2017). This theory assumes that coldwater species (e.g., *Lednia*) will not be able to tolerate warmer conditions and will be extirpated while lower elevation species simultaneously track their preferred thermal conditions upstream. However, if existing headwater communities can tolerate warmer conditions and their lower limits are set by other factors (e.g., predation), then climate change risks for mountain stream communities may be far less generalizable than currently assumed.

## Conclusion:

High-elevation stoneflies in the Rocky Mountains can tolerate short-term temperatures well beyond those they experience in the wild. When challenged with high temperatures, nymphs mount a cellular stress response that includes upregulation of classic stress response genes (e.g., HSPs) as well as genes that may be involved in developmental transitions from aquatic to terrestrial life stages. Aquatic insects are known to develop more rapidly at warmer temperatures (Nebeker, 1971). Our own laboratory tests of *L. tumana*, however, support a thermal limit of ~15°C where mortality during emergence greatly increases (S.H. and A.A.S., unpublished data). Thus, the potential for warming, even in the short-term, to accelerate development to the point of lethality warrants further investigation. However, in light of our results and similar studies (Ebner *et al.*, 2019, Shah *et al.*, 2017b), we challenge the premise that the distribution of mountain stream insects in cold, thermally stable habitats indicates specialized preferences for cold, or evolved physiologies that are only viable in the cold. Rather, the appearance of constitutive expression of many HSPs in *Lednia* as well as the inability of *L. tumana* to survive being enclosed in ice (Hotaling *et al.*, In review) suggest that the contemporary thermal regimes they experience may actually be injurious. Ultimately, if

potentially imperiled species like *Lednia* are not directly threatened by warming temperatures in the near-term, then there is clear reason for greater optimism about their future. However, explicit investigations of their development under warmer regimes, rather than simplistic, short-term exposures, are needed as well as more nuanced understanding of how species interactions and resource availability shape their distributions.

# **Acknowledgements:**

We thank the University of Wyoming-National Park Service (UW-NPS) Research Station for funding. S.H. was supported by NSF awards #OPP-1906015 and #IOS-1557795. A.A.S. was supported by an NSF Postdoctoral Research Fellowship in Biology (DBI-1807694). Harold Bergman, Winsor Lowe, Taylor Price, and Lydia Zeglin provided valuable logistic, laboratory, or field assistance. The UW-NPS Research Station provided laboratory space to perform the experiments and the Ghalambor Lab provided insect holding equipment. We performed computational analyses on the Kamiak High Performance Computing Cluster at Washington State University. We thank Christopher Kozakiewicz and Mark Smithson for comments that improved the manuscript. Any use of trade, firm, or product names is for descriptive purposes only and does not imply endorsement by the U.S. Government.

# **Author contributions:**

S.H. and A.A.S. conceived of the study. S.H., A.A.S., K.L.M., L.M.T., J.J.G., D.S.F., M.E.D., and J.L.K. collected the data. S.H. and A.A.S. analyzed the data and wrote the manuscript with input from K.L.M., H.A.W., and J.L.K. All authors read and approved the final version.

# **References:**

- Amore V, Gaetani B, Puig MA, Fochetti R (2011) New data on the presence of hemocyanin in Plecoptera: Recomposing a puzzle. *J Insect Sci*, **11**, 153.
- Andrews RM (1998) Geographic variation in field body temperature of *Sceloporus* lizards. *Journal of Thermal Biology*, **23**, 329-334.
- Andrews S (2010) FastQC: a quality control tool for high throughput sequence data. pp Page, Babraham Bioinformatics, Babraham Institute, Cambridge, United Kingdom.
- Angilletta Jr MJ, Wilson RS, Niehaus AC, Sears MW, Navas CA, Ribeiro PL (2007) Urban physiology: city ants possess high heat tolerance. *PLoS One*, **2**, e258.
- Araújo MB, New M (2007) Ensemble forecasting of species distributions. *Trends in Ecology & Evolution*, **22**, 42-47.

Bálint M, Domisch S, Engelhardt C *et al.* (2011) Cryptic biodiversity loss linked to global climate change. *Nature Climate Change*, **1**, 313.

Boeckmann B, Bairoch A, Apweiler R *et al.* (2003) The SWISS-PROT protein knowledgebase and its supplement TrEMBL in 2003. *Nucleic Acids Res*, **31**, 365-370.

Brattstrom BH (1968) Thermal acclimation in anuran amphibians as a function of latitude and altitude. *J Comparative Biochemistry & Physiology*, **24**, 93-111.

Broehan G, Kroeger T, Lorenzen M, Merzendorfer H (2013) Functional analysis of the ATP-binding cassette (ABC) transporter gene family of *Tribolium castaneum*. *BMC Genomics*, **14**, 6.

Buckley BA, Place SP, Hofmann GE (2004) Regulation of heat shock genes in isolated hepatocytes from an Antarctic fish, *Trematomus bernacchii*. *Journal of Experimental Biology*, **207**, 3649-3656.

Burmester T (2015) Expression and evolution of hexamerins from the tobacco hornworm, *Manduca sexta*, and other Lepidoptera. *Insect Biochemistry and Molecular Biology*, **62**, 226-234.

Bushnell B (2014) BBTools software package.

Chown SL, Hoffmann AA, Kristensen TN, Angilletta Jr MJ, Stenseth NC, Pertoldi C (2010) Adapting to climate change: a perspective from evolutionary physiology. *Climate Research*, **43**, 3-15.

Conesa A, Götz S, García-Gómez JM, Terol J, Talón M, Robles M (2005) Blast2GO: a universal tool for annotation, visualization and analysis in functional genomics research. *Bioinformatics*, **21**, 3674-3676.

Connell JH (1961) The influence of interspecific competition and other factors on the distribution of the barnacle *Chthamalus stellatus*. *Ecology*, **42**, 710-723.

Dassati S, Waldner A, Schweigreiter R (2014) Apolipoprotein D takes center stage in the stress response of the aging and degenerative brain. *Neurobiol Aging*, **35**, 1632-1642.

Ebner JN, Ritz D, Von Fumetti S (2019) Comparative proteomics of stenotopic caddisfly *Crunoecia irrorata* identifies acclimation strategies to warming. *Mol Ecol*, **28**, 4453-4469.

Ewels P, Magnusson M, Lundin S, Käller M (2016) MultiQC: summarize analysis results for multiple tools and samples in a single report. *Bioinformatics*, **32**, 3047-3048.

Feder ME, Lynch JF (1982) Effects of latitude, season, elevation, and microhabitat on field body temperatures of neotropical and temperate zone salamanders. *Ecology*, **63**, 1657-1664.



Finn DS, Khamis K, Milner AM (2013) Loss of small glaciers will diminish beta diversity in Pyrenean streams at two levels of biological organization. *Global Ecology and Biogeography*, **22**, 40-51.

Gamboa M, Tsuchiya MC, Matsumoto S, Iwata H, Watanabe K (2017) Differences in protein expression among five species of stream stonefly (Plecoptera) along a latitudinal gradient in Japan. *Archives of Insect Biochemistry & Physiology*, **96**, e21422.

Giersch JJ, Hotaling S, Kovach RP, Jones LA, Muhlfeld CC (2017) Climate-induced glacier and snow loss imperils alpine stream insects. *Global Change Biology*, **23**, 2577-2589.

Giersch JJ, Jordan S, Luikart G, Jones LA, Hauer FR, Muhlfeld CC (2015) Climate-induced range contraction of a rare alpine aquatic invertebrate. *Freshwater Science*, **34**, 53-65.

Gilchrist GW (1995) Specialists and generalists in changing environments. I. Fitness landscapes of thermal sensitivity. *Am Nat*, **146**, 252-270.

Gutiérrez-Pesquera LM, Tejedo M, Olalla-Tárraga M, Duarte H, Nicieza A, Solé M (2016) Testing the climate variability hypothesis in thermal tolerance limits of tropical and temperate tadpoles. *Journal of Biogeography*, **43**, 1166-1178.

Hagner-Holler S, Pick C, Girgenrath S, Marden JH, Burmester T (2007) Diversity of stonefly hexamerins and implication for the evolution of insect storage proteins. *Insect Biochemistry and Molecular Biology*, **37**, 1064-1074.

Haunerland N (1996) Insect storage proteins: gene families and receptors. *Insect Biochemistry & Molecular Biology*, **26**, 755-765.

Healy TM, Brennan RS, Whitehead A, Schulte PM (2018) Tolerance traits related to climate change resilience are independent and polygenic. *Global Change Biology*, **24**, 5348-5360.

Hotaling S, Finn DS, Joseph Giersch J, Weisrock DW, Jacobsen D (2017) Climate change and alpine stream biology: progress, challenges, and opportunities for the future. *Biological Reviews*, **92**, 2024-2045.

Hotaling S, Foley ME, Zeglin LH *et al.* (2019a) Microbial assemblages reflect environmental heterogeneity in alpine streams. *Global Change Biology*, **25**, 2576-2590.

Hotaling S, Giersch JJ, Finn DS *et al.* (2019b) Congruent population genetic structure but differing depths of divergence for three alpine stoneflies with similar ecology, geographic distributions, and climate change threats. *Freshwater Biology*, **64**, 335-347.

Hotaling S, Kelley JL, Weisrock DW (2019c) Nuclear and mitochondrial genomic resources for the meltwater stonefly (Plecoptera: Nemouridae), *Lednia tumana* (Ricker, 1952). *Aquatic Insects*, 1-8.

Hotaling S, Shah AA, Dillon ME, Giersch JJ, Tronstad LM, Finn DS, Kelley JL (In review) Cold physiology of mountain stoneflies (Plecoptera: Nemouridae): Insights from the high Rocky Mountains. *Western North American Naturalist*.

Huey RB, Webster TP (1976) Thermal biology of Anolis lizards in a complex fauna: the Christatellus group on Puerto Rico. *Ecology*, **57**, 985-994.

Huss M, Hock R (2018) Global-scale hydrological response to future glacier mass loss. *Nature Climate Change*, **8**, 135.

Isaak DJ, Young MK, Nagel DE, Horan DL, Groce MC (2015) The cold-water climate shield: delineating refugia for preserving salmonid fishes through the 21st century. *Global Change Biology*, **21**, 2540-2553.

Jacobsen D, Milner AM, Brown LE, Dangles O (2012) Biodiversity under threat in glacier-fed river systems. *Nature Climate Change*, **2**, 361-364.

Jones LA, Muhlfeld CC, Marshall LA, McGlynn BL, Kershner JL (2014) Estimating Thermal Regimes of Bull Trout and Assessing the Potential Effects of Climate Warming on Critical Habitats. *River Research and Applications*, **30**, 204-216.

Jordan S, Giersch JJ, Muhlfeld CC, Hotaling S, Fanning L, Tappenbeck TH, Luikart G (2016) Loss of genetic diversity and increased subdivision in an endemic alpine stonefly threatened by climate change. *PLoS One*, **11**, e0157386.

Kalvari I, Argasinska J, Quinones-Olvera N *et al.* (2017) Rfam 13.0: shifting to a genome-centric resource for non-coding RNA families. *Nucleic Acids Res*, **46**, D335-D342.

Kearney M, Shine R, Porter WP (2009) The potential for behavioral thermoregulation to buffer “cold-blooded” animals against climate warming. *Proceedings of the National Academy of Sciences*, **106**, 3835-3840.

Khamis K, Brown LE, Hannah DM, Milner AM (2015) Experimental evidence that predator range expansion modifies alpine stream community structure. *Freshwater Science*, **34**, 66-80.

King AM, Macrae TH (2015) Insect heat shock proteins during stress and diapause. *Annual Review of Entomology*, **60**, 59-75.

Krueger F (2015) Trim Galore!: a wrapper tool around Cutadapt and FastQC to consistently apply quality and adapter trimming to FastQ files. Babraham Bioinformatics, Cambridge, United Kingdom. pp Page.

Li H, Handsaker B, Wysoker A *et al.* (2009) The sequence alignment/map format and SAMtools. *Bioinformatics*, **25**, 2078-2079.

Lindquist S, Craig E (1988) The heat-shock proteins. *Annual Review of Genetics*, **22**, 631-677.

Lister BC, Garcia A (2018) Climate-driven declines in arthropod abundance restructure a rainforest food web. *Proceedings of the National Academy of Sciences*, **115**, E10397-E10406.

Lun AT, Chen Y, Smyth GK (2016) It's DE-licious: a recipe for differential expression analyses of RNA-seq experiments using quasi-likelihood methods in edgeR. In: *Statistical Genomics*. pp Page., Springer.

Markl J, Winter S (1989) Subunit-specific monoclonal antibodies to tarantula hemocyanin, and a common epitope shared with calliphorin. *Journal of Comparative Physiology B*, **159**, 139-151.

Mccarthy DJ, Chen Y, Smyth GK (2012) Differential expression analysis of multifactor RNA-Seq experiments with respect to biological variation. *Nucleic Acids Res*, **40**, 4288-4297.

Nebeker AV (1971) Effect of water temperature on nymphal feeding rate, emergence, and adult longevity of the stonefly *Pteronarcys dorsata*. *Journal of the Kansas Entomological Society*, 21-26.

Peckarsky BL, Mcintosh AR, Horn SC *et al.* (2014) Characterizing disturbance regimes of mountain streams. *Freshwater Science*, **33**, 716-730.

Pertea M, Pertea GM, Antonescu CM, Chang T-C, Mendell JT, Salzberg SL (2015) StringTie enables improved reconstruction of a transcriptome from RNA-seq reads. *Nature Biotechnology*, **33**, 290.

Portner HO, Peck L, Somero G (2007) Thermal limits and adaptation in marine Antarctic ectotherms: an integrative view. *Philos Trans R Soc Lond B Biol Sci*, **362**, 2233-2258.

R Core Team (2013) R: A language and environment for statistical computing.

Rempel RS, Carter JC (1987) Temperature influences on adult size, development, and reproductive potential of aquatic Diptera. *Canadian Journal of Fisheries & Aquatic Sciences*, **44**, 1743-1752.

Reyes MA, Corcuera LJ, Cardemil L (2003) Accumulation of HSP70 in *Deschampsia antarctica* Desv. leaves under thermal stress. *Antarctic Science*, **15**, 345-352.

Rezende EL, Tejedo M, Santos M (2011) Estimating the adaptive potential of critical thermal limits: methodological problems and evolutionary implications. *Functional Ecology*, **25**, 111-121.

Risso D, Ngai J, Speed TP, Dudoit S (2014) Normalization of RNA-seq data using factor analysis of control genes or samples. *Nature Biotechnology*, **32**, 896.

Robinson MD, Mccarthy DJ, Smyth GK (2010) edgeR: a Bioconductor package for differential expression analysis of digital gene expression data. *Bioinformatics*, **26**, 139-140.

Roughgarden J (1974) Niche width: biogeographic patterns among *Anolis* lizard populations. *Am Nat*, **108**, 429-442.

Sánchez-Bayo F, Wyckhuys KA (2019) Worldwide decline of the entomofauna: A review of its drivers. *Biological Conservation*, **232**, 8-27.

Seebacher F, White CR, Franklin CE (2015) Physiological plasticity increases resilience of ectothermic animals to climate change. *Nature Climate Change*, **5**, 61.

Shah AA, Funk WC, Ghalambor CK (2017a) Thermal acclimation ability varies in temperate and tropical aquatic insects from different elevations. *J Integrative Comparative Biology*, **57**, 977-987.

Shah AA, Gill BA, Encalada AC *et al.* (2017b) Climate variability predicts thermal limits of aquatic insects across elevation and latitude. *Functional Ecology*, **31**, 2118-2127.

Sims D, Iltott NE, Sansom SN *et al.* (2014) CGAT: computational genomics analysis toolkit. *Bioinformatics*, **30**, 1290-1291.

Terblanche JS, Hoffmann AA, Mitchell KA, Rako L, Le Roux PC, Chown SL (2011) Ecologically relevant measures of tolerance to potentially lethal temperatures. *J Exp Biol*, **214**, 3713-3725.

Trapnell C, Roberts A, Goff L *et al.* (2012) Differential gene and transcript expression analysis of RNA-seq experiments with TopHat and Cufflinks. *Nature Protocols*, **7**, 562.

Treanor HB, Giersch JJ, Kappenman KM, Muhlfeld CC, Webb MaH (2013) Thermal tolerance of meltwater stonefly *Lednia tumananympha* from an alpine stream in Waterton–Glacier International Peace Park, Montana, USA. *Freshwater Science*, **32**, 597-605.

Tronstad LM, Hotelling S, Giersch JJ, Wilmot OJ, Finn DS (2019) Headwater streams fed by subterranean ice: potential climate refugia for mountain communities? *bioRxiv*.

U.S. Fish & Wildlife Service (2019) Endangered and Threatened Wildlife and Plants: Threatened Species Status for Meltwater *Lednian* Stonefly and Western Glacier Stonefly with a Section 4(d) Rule. *Federal Register*, **84**, 64210-64227.

Urban MC, Bocedi G, Hendry AP *et al.* (2016) Improving the forecast for biodiversity under climate change. *Science*, **353**, aad8466.

Verberk WC, Overgaard J, Ern R, Bayley M, Wang T, Boardman L, Terblanche JS (2016) Does oxygen limit thermal tolerance in arthropods? A critical review of current evidence. *Comparative Biochemistry & Physiology Part A: Molecular Integrative Physiology*, **192**, 64-78.

Ward J (1994) Ecology of alpine streams. *Freshwater Biology*, **32**, 277-294.
